# Supplementary material for: Partial Somatic to Stem Cell Transformations Induced By Cell-Permeable Reprogramming Factors
Source: PubMed Central journal article supplement — Sci Rep. 2014 Mar 12;4:4361. doi: 10.1038/srep04361 (PMC3950638; doi:10.1038/srep04361), 2014-03-12
Supplement: srep04361-s1.pdf [file srep04361-s1.pdf]

*Supplementary materials*

*of*

**Partial Somatic to Stem Cell Transformations Induced By Cell-Permeable Reprogramming  
Factors**

Junghee Lim<sup>1\*</sup>, Junghee Kim<sup>1\*</sup>, Jinsun Kang<sup>1</sup>, and Daewoong Jo<sup>1,2,3</sup>

<sup>1</sup>ProCell R&D Institute, ProCell Therapeutics, Inc., Ace-Twin Tower II, Guro3-dong, Guro-gu, Seoul 152-790, Korea, <sup>2</sup>Department of Biomedical Sciences, Chonnam National University Medical School, 5 Hak-dong, Dong-gu, Kwangju 501-757, Korea, <sup>3</sup>Departments of Surgery, Vanderbilt University School of Medicine, 2215B Garland Avenue, Nashville, TN 37232, USA

Correspondence and requests for materials should be addressed to D.J. (email: daewoong.jo@vanderbilt.edu)

## Supporting Information

**Figure S1. FACS analysis of MTD-mediated protein uptake by cultured cells.** RAW 264.7 cells were treated for 1 hr at 37°C with buffer alone (gray, cells only), with 10  $\mu$ M unconjugated FITC (black, FITC only) or with 10  $\mu$ M FITC-conjugated enhanced green fluorescent proteins (EGFP) containing a random peptide (blue line, FITC-HSE), the Fibroblast Growth Factor 4-derived membrane translocating sequence (FGF4 MTS, red line, FITC-HM<sub>m</sub>E) or one of the following MTDs (green line, FITC-HME) counter clockwise from top left: MTD84, MTD86, MTD47, MTD132, MTD181, MTD173 and MTD52. The cells were then washed 3 times and analyzed by Flow cytometry.

**Figure S2. Fluorescence confocal laser scanning micrographs of macromolecule transduction domain-mediated protein uptake.** NIH3T3 cells were treated for 1 hr at 37°C with buffer alone (cells only), 10  $\mu$ M unconjugated FITC (FITC only), or with 10  $\mu$ M FITC-conjugated EGFPs containing a random peptide (FITC-HSE), the FGF4 MTS (FITC-HM<sub>m</sub>E) or a MTD designated with the numbered subscript. Green fluorescence results from internalized protein resistant to extensive washing and protease treatment. Nuclei were stained (red) with propidium iodide (PI). Bottom panels show Nomarski images of the same cells.

**Figure S3. Transactivation of reporter gene expression by cell-permeable reprogramming factors.** Luciferase reporter plasmids under the control of OCT4-, SOX2-, KLF4A- and CMYC-response elements were introduced by lipofection into HEK293 cells. After 12 hrs, the cells were treated either with the appropriate CP-RF or with cell-permeable Cre recombinase (CP-

Cre), which served as a negative control, i.e., a protein without transactivation activity. Relative luciferase activities are plotted relative to CP-Cre treatment, expressed as means  $\pm$  s.d. for triplicate values from three independent experiments. *p* values were determined by an unpaired Student's *t*-test.

**Table S1. Macromolecule transduction domains (MTDs).** The 7 MTDs used in the present study were identified while screening 1,500 potential signal peptides for sequences capable of enhancing protein uptake by cultured cells. The final MTD sequences were shortened and modified from the original primarily to enhance their predicted  $\alpha$ -helical structure.

**Table S2. PCR primers used to construct recombinant cell-permeable reprogramming factors.** Coding sequences for EGFP (E) and reprogramming factors (OCT4, SOX2, KLF4, CMYC, NANOG and LIN28; abbreviated O, S, K, M, N, and L, respectively) were cloned into pET-28a(+) from DNA segments PCR amplified using 5' and 3' flanking primers.

Supplementary  
Figure S1

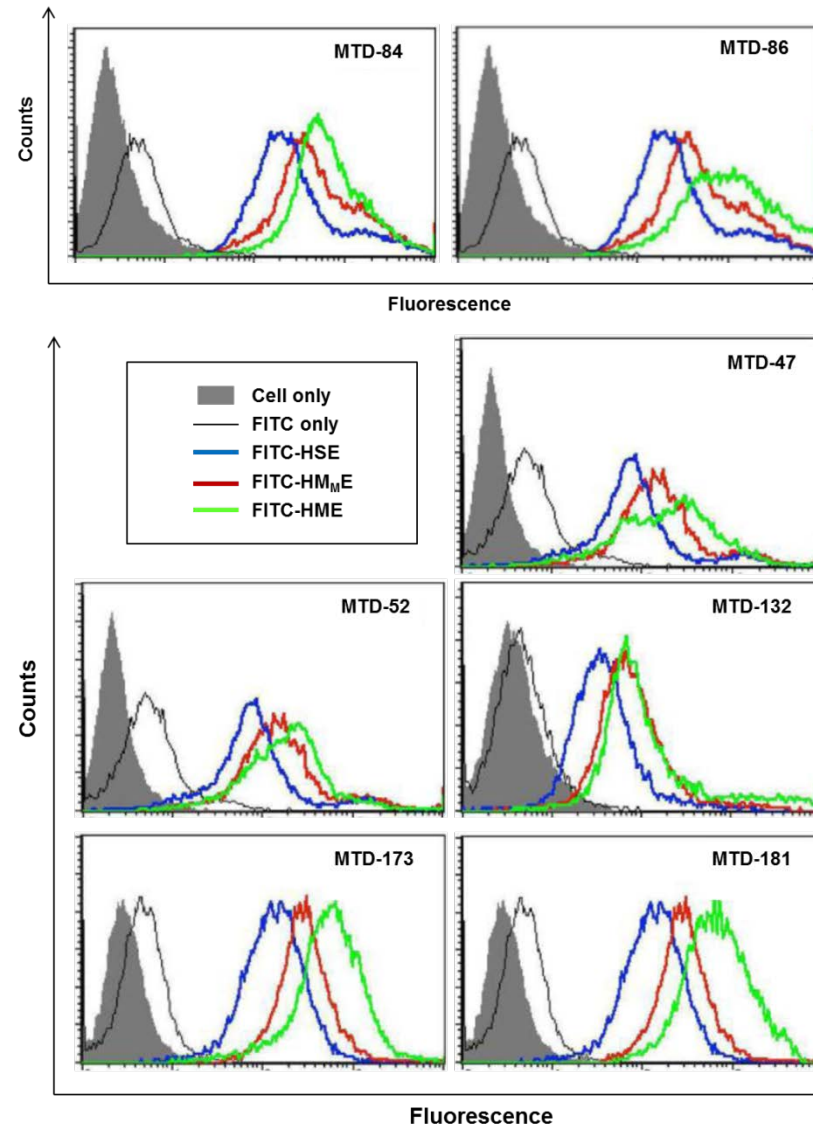

Supplementary  
Figure S2

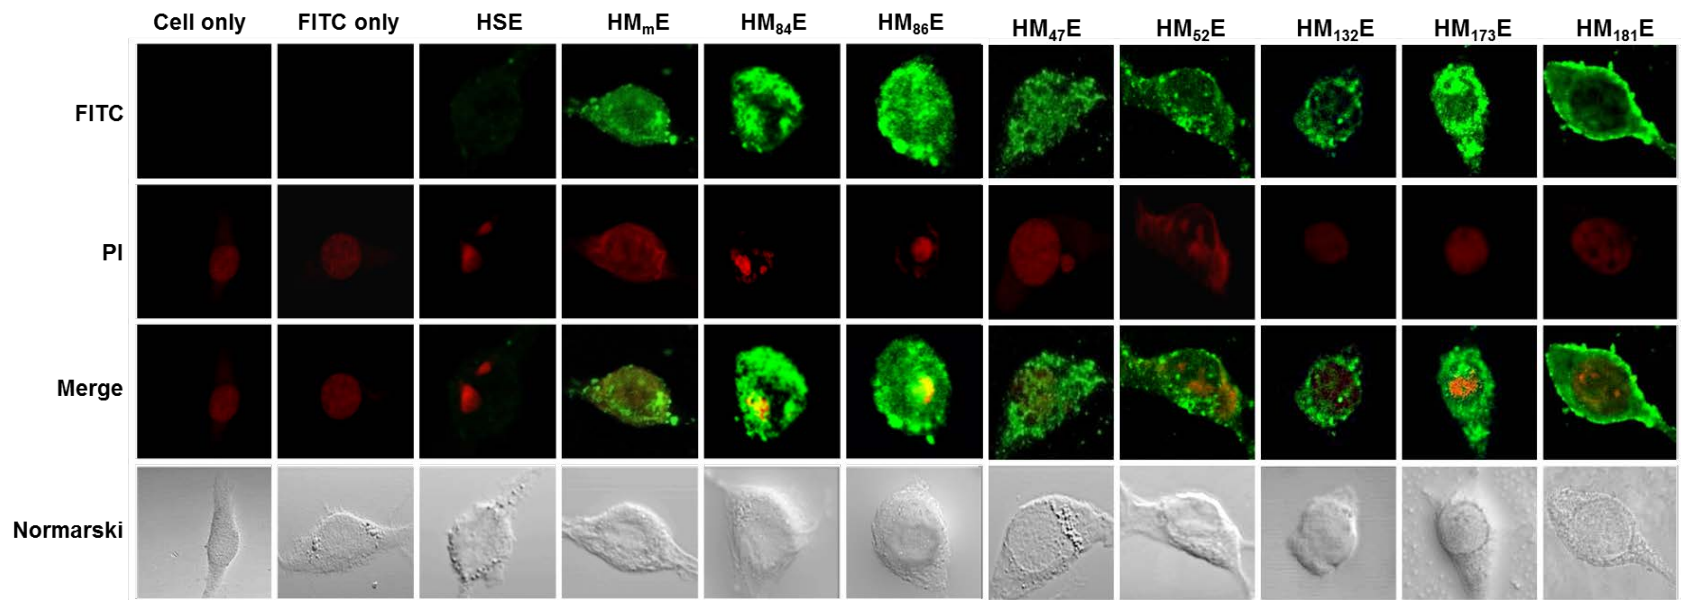

Supplementary  
Figure S3

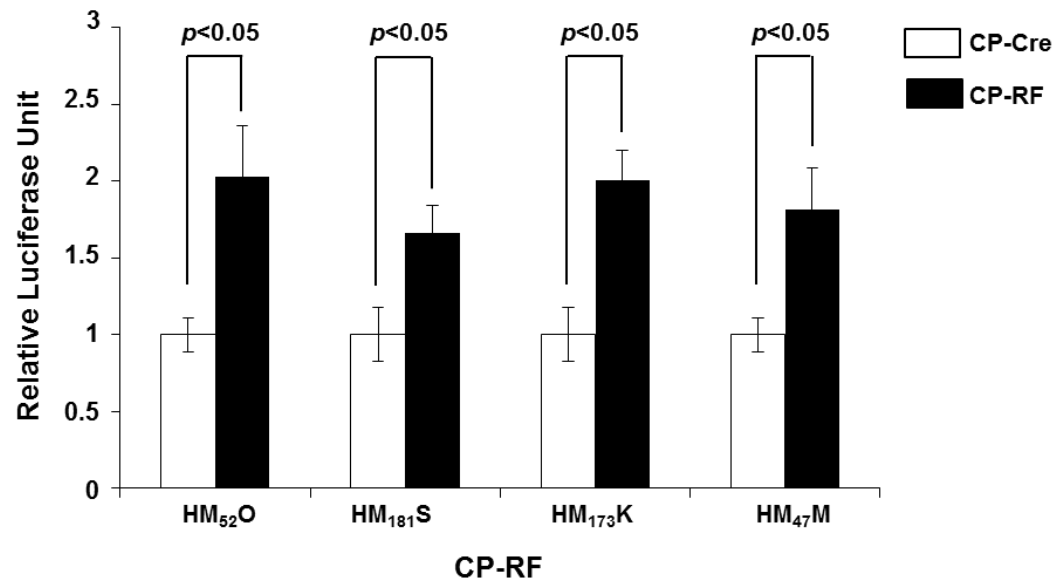

**Supplementary  
Table S1**

**A**

| <b>Information</b>       | <b>MTD-84</b>                                      | <b>MTD-86</b>                                             |
|--------------------------|----------------------------------------------------|-----------------------------------------------------------|
| <b>Origin</b>            | <i>Phytophthora cactorum</i>                       | <i>Streptomyces coelicolor</i>                            |
| <b>Protein</b>           | Phytotoxic portein PcF precursor                   | Peptide Transport system secreted peptide binding protein |
| <b>Accession Number</b>  | AAK63068                                           | NP_629842                                                 |
| <b>Original Sequence</b> | <sup>2</sup> NFKTCPAVALVAVVATVATAEDP <sup>24</sup> | <sup>20</sup> RLAAAGAGALLLASGAVAPSV <sup>42</sup>         |
| <b>Final Sequence</b>    | AVALVAVVA                                          | LLAAAAALLA                                                |

**B**

| <b>Information</b>       | <b>MTD-47</b>                                   | <b>MTD-52</b>                                      | <b>MTD-132</b>                                   | <b>MTD-173</b>                                 | <b>MTD-181</b>                                     |
|--------------------------|-------------------------------------------------|----------------------------------------------------|--------------------------------------------------|------------------------------------------------|----------------------------------------------------|
| <b>Origin</b>            | <i>StrePtomyces coelicolor</i>                  | <i>Homo sapiens</i>                                | <i>StrePtomyces coelicolor</i>                   | <i>StrePtomyces coelicolor</i>                 | <i>Neisseria meningitidis</i> Z2491                |
| <b>Protein</b>           | Secreted Protein                                | Ficlin 3 isoform 2 precursor                       | P60-family secreted protein                      | Secreted Protein                               | Putative secreted protein                          |
| <b>Accession Number</b>  | NP_627512                                       | NP_775628                                          | NP_628377                                        | NP_624384                                      | CAB84257.1                                         |
| <b>Original Sequence</b> | <sup>23</sup> VLVGAAAVPVMMLVA AGC <sup>39</sup> | <sup>1</sup> MDLLWILPSLWLLLLG GPACLK <sup>22</sup> | <sup>7</sup> VLTTTAVTVVCAITVL AAPG <sup>26</sup> | <sup>4</sup> LGLSAVMISILAVTGC GG <sup>21</sup> | <sup>4</sup> MFLSAVLLLSAAAQTV WADTVF <sup>25</sup> |
| <b>Final Sequence</b>    | AAAVPVLVAA                                      | PLLLLLPAL                                          | AVVVPAILAAP                                      | AVIPILAVP                                      | AVKKKPAAA                                          |

**Supplementary Table S2**

| <b>Primer</b>                                 | <b>Sequence</b>                                                          |
|-----------------------------------------------|--------------------------------------------------------------------------|
| HO-5' (45nts)                                 | CCGCATATGAAGAAGAAGAGGAAGGCCGGGACACCTGGCT TCGGAT                          |
| HO-3' (36nts)                                 | CCGCATATGTCAGTTTGAATGCATGGGAGAGCCCAG                                     |
| HS-5' (45nts)                                 | CCGCATATGAAGAAGAAGAGGAAGTACAACATGATGGAG ACGGAG                           |
| HS-3' (36nts)                                 | CCGCATATGTCACATGTGTGAGAGGGGCAGTGTGCC                                     |
| HK-5' (45nts)                                 | CCGCATATGAAGAAGAAGAGGAAGGCTGTCAGCGACGCG CTGCTC                           |
| HK-3' (36nts)                                 | CCGCATATGTTAAAAATGCCTCTTCATGTGTAAGGC                                     |
| HM-5' (45nt)                                  | CCGCATATGAAGAAGAAGAGGAAGGATTTTTTTTCGGGTA GTGGAA                          |
| HM-3' (36nts)                                 | CCGCATATGTTACGCACAAGAGTTCCGTAGCTGTTC                                     |
| HN-5' (45nts)                                 | CCGCATATGAAGAAGAAGAGGAAGAGTGTGGATCCAGCTTGTCCC                            |
| HN-3' (36nts)                                 | CCGCATATGTCACACGTCTTCAGGTTGCATGTTTCAT                                    |
| HOM <sub>84</sub> -3' (63nts)                 | CCGCATATGTCACAGCACCGCCAGCAGCGCCGCCACCAGTTTTGAATGCATGGGAGAGCCCAG          |
| HM <sub>86</sub> SM <sub>86</sub> -5' (72nts) | CCGCATATGAAGAAGAAGAGGAAGCTGGCGGTGCTGGCGGCGGCGCCGTACAACATGATGGAGACGGAGCTG |
| HM <sub>86</sub> SM <sub>86</sub> -3' (60nts) | CCGCATATGTCACGGCGCCGCCAGCACCGCCAGCATGTGTGAGAGGGGCAGTGTGCC                |
| HM <sub>86</sub> KM <sub>86</sub> -5' (72nts) | CCGCATATGAAGAAGAAGAGGAAGCTGGCGGTGCTGGCGGCGGCGCCGGCTGTCAGCGACGCGCTGCTCCCA |
| HM <sub>86</sub> KM <sub>86</sub> -3' (60nts) | CCGCATATGTTACGGCGCCGCCAGCACCGCCAGAAAATGCCTCTTCATGTGTAAGGC                |
| HM <sub>86</sub> M-5' (72nts)                 | CCGCATATGAAGAAGAAGAGGAAGCTGGCGGTGCTGGCGGCGGCGCCGATTTTTTTTCGGGTAGTGGAAAAC |
| HM <sub>86</sub> N-5' (72nts)                 | CCGCATATGAAGAAGAAGAGGAAGCTGGCGGTGCTGGCGGCGGCGCCGAGTGTGGATCCAGCTTGTCCCCAA |
